# Supplementary material for: Bamboo-like nitrogen-doped porous carbon nanofibers encapsulated nickel–cobalt alloy nanoparticles composite material derived from the electrospun fiber of a bimetal–organic framework as efficient bifunctional oxygen electrocatalysts
Source: Royal Society of Chemistry journal article supplement (doi:10.1039/c9nr10943a), 2020-01-01
Supplement: c9nr10943a1.pdf [file c9nr10943a1.pdf]

## Electronic Supporting Information

### **Bamboo-like nitrogen-doped porous carbon nanofibers encapsulated nickel-cobalt alloy nanoparticles composite material derived from the electrospun fiber of bimetal–organicframework as efficient bifunctional oxygen electrocatalysts**

Chao Feng,<sup>a</sup> Yuan Guo,<sup>a</sup> Yuehong Xie,<sup>a</sup> Xianglei Cao,<sup>a</sup> Shiang Li,<sup>a</sup> Liugen Zhang,<sup>a</sup> Wei Wang,<sup>b</sup> Jide

Wang<sup>\*a</sup>

*<sup>a</sup>Key Laboratory of Oil & Gas Fine Chemicals Ministry of Education & Xinjiang Uyghur Autonomous Region, Xinjiang University, Urumqi 830046, Xinjiang, China*

*<sup>b</sup>Department of Chemistry and Centre for Pharmacy, University of Bergen, Bergen 5007, Norway*

\* Corresponding author. E-mail: awangjd@sina.cn

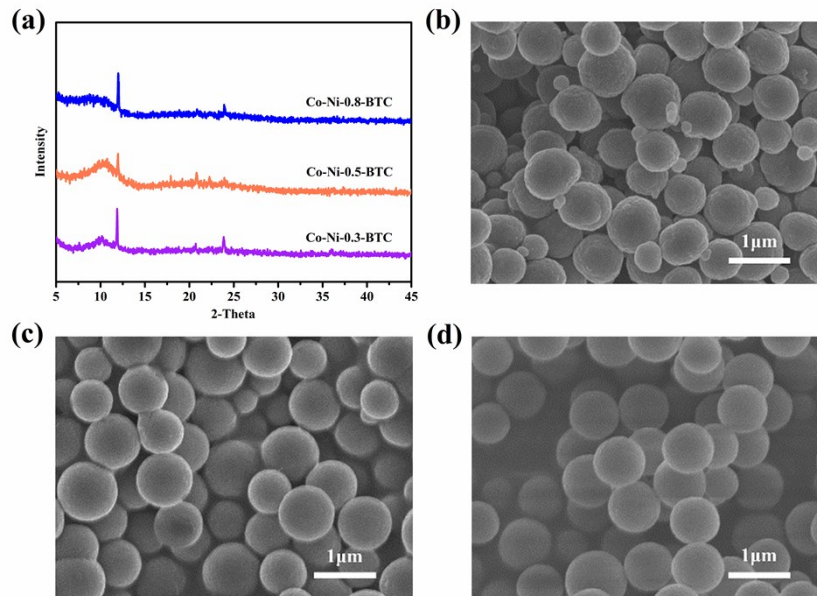

**Fig. S1** (a) XRD patterns and SEM images of (b) Ni-Co-0.3-BTC, (c) Ni-Co-0.5-BTC and (d) Ni-Co-0.8-BTC.

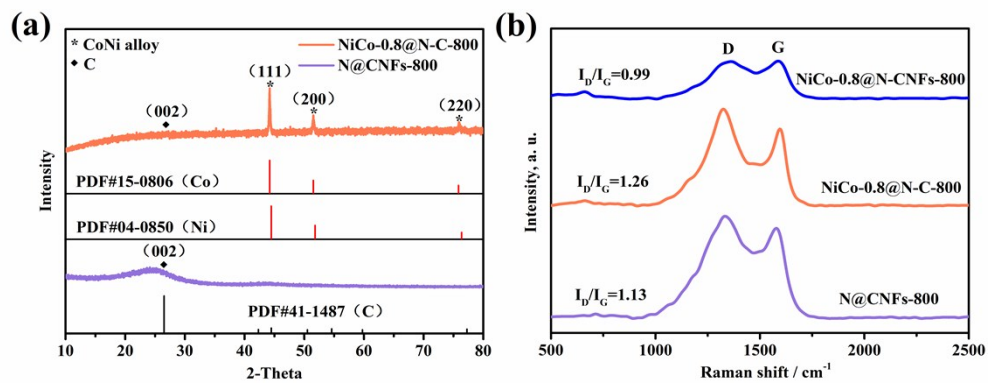

**Fig. S2** (a) XRD patterns of NiCo-0.8@N-C-800 and N@CNFs-800 and (b) Raman spectra of NiCo-0.8@N-CNFs-800, N@CNFs-800 and NiCo-0.8@N-C-800.

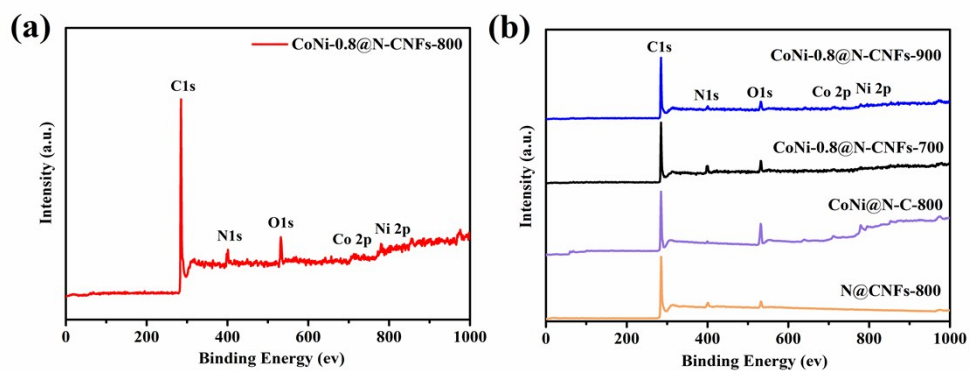

**Fig. S3** Surface full spectrum of (a) NiCo-0.8@N-CNFs-800 (b) NiCo-0.8@N-CNFs-900, NiCo-0.8@N-CNFs-700, NiCo-0.8@N-C-800 and N@CNFs-800.

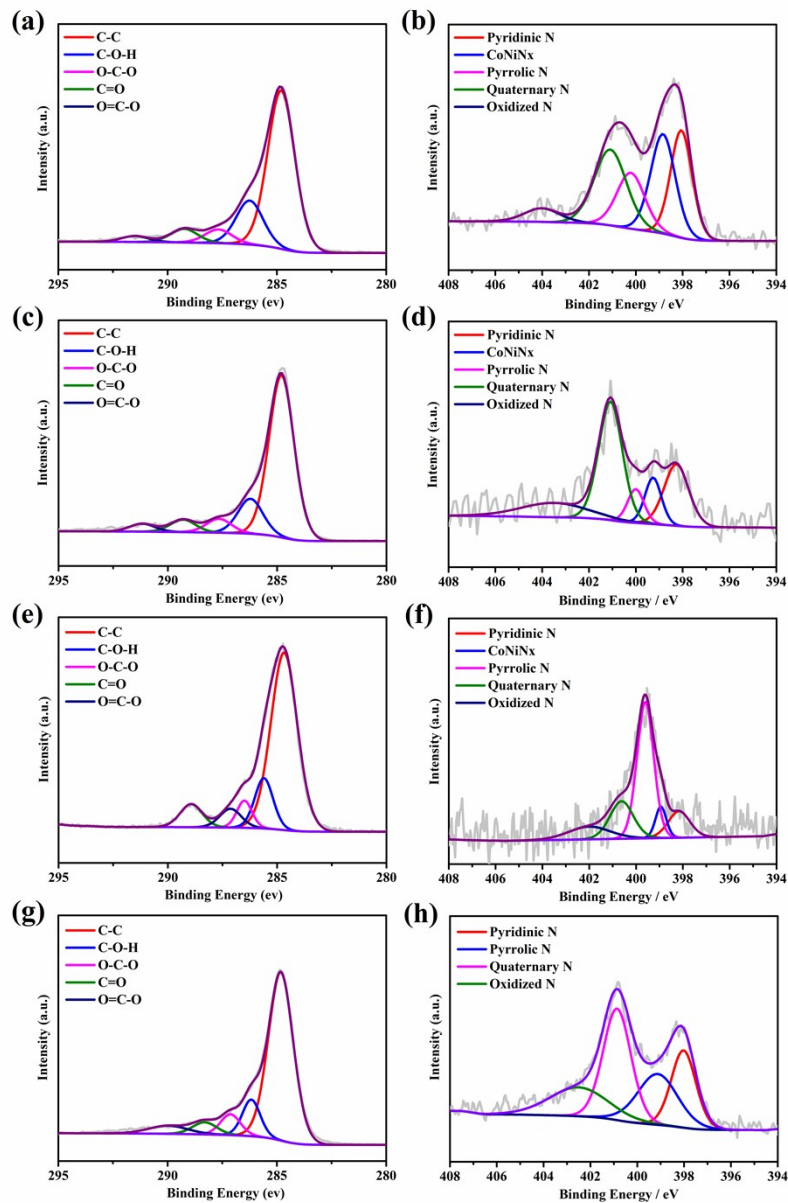

**Fig. S4** (a) C 1s spectra and (b) N 1s spectra of NiCo-0.8@N-CNFs-700, (c) C 1s spectra and (d) N 1s spectra of NiCo-0.8@N-CNFs-900, (e) C 1s spectra and (f) N 1s spectra of NiCo-0.8@N-C-800; (g) C 1s spectra and (h) N 1s spectra of N@CNFs-800.

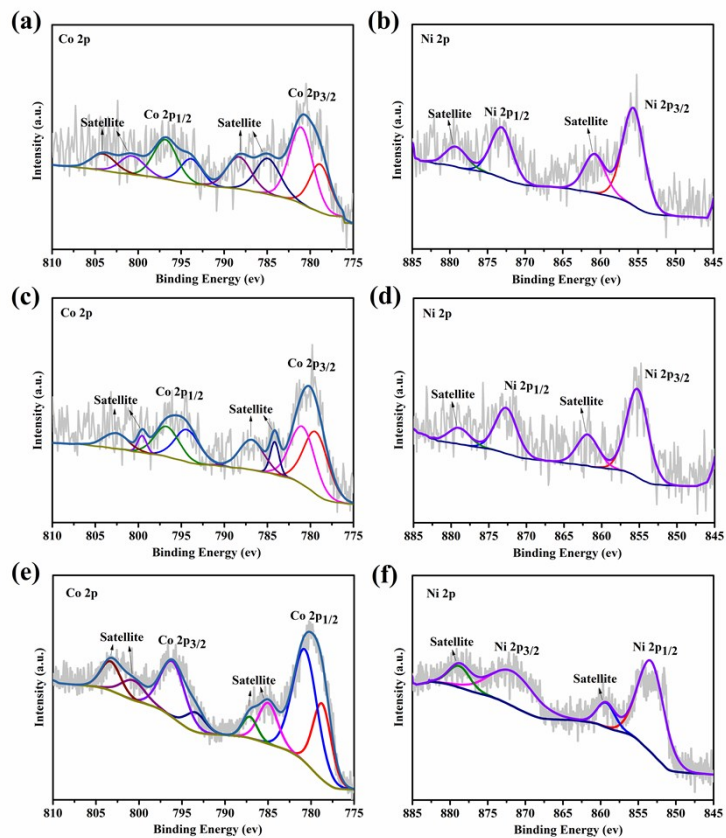

**Fig. S5** (a) Co 2p spectra and (b) Ni 2p spectra of NiCo-0.8@N-CNFs-700; (c) Co 2p spectra and (d) Ni 2p spectra of NiCo-0.8@N-CNFs-900; (e) Co 2p spectra and (f) Ni 2p spectra of NiCo-0.8@N-C-800.

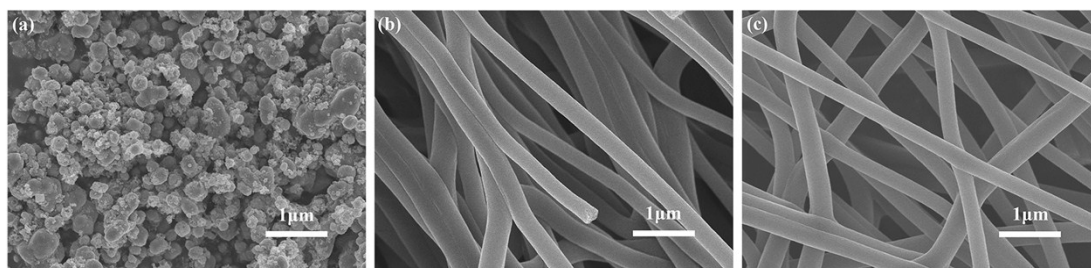

**Fig. S6** SEM images of (a) NiCo-0.8@N-C-800, (b) Pure PAN fibers and (c) N@CNFs-800.

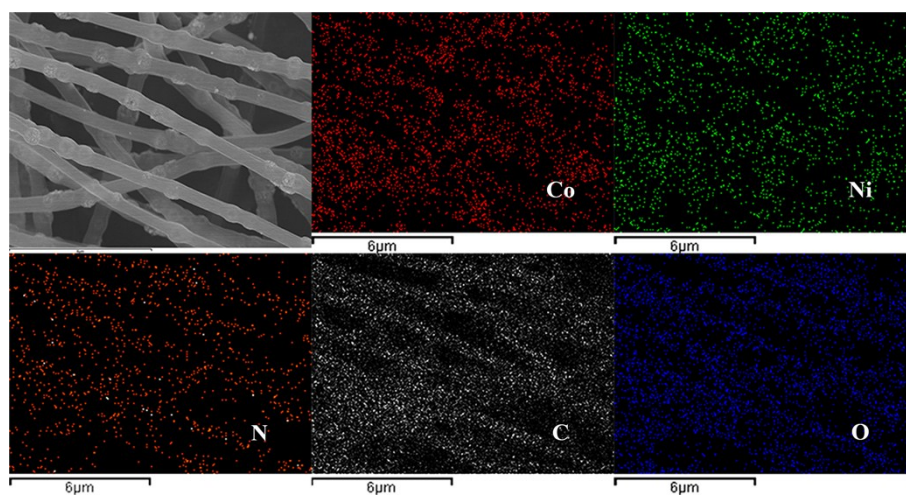

**Fig. S7** Elemental mapping of NiCo-0.8@N-CNFs-800 electrocatalyst.

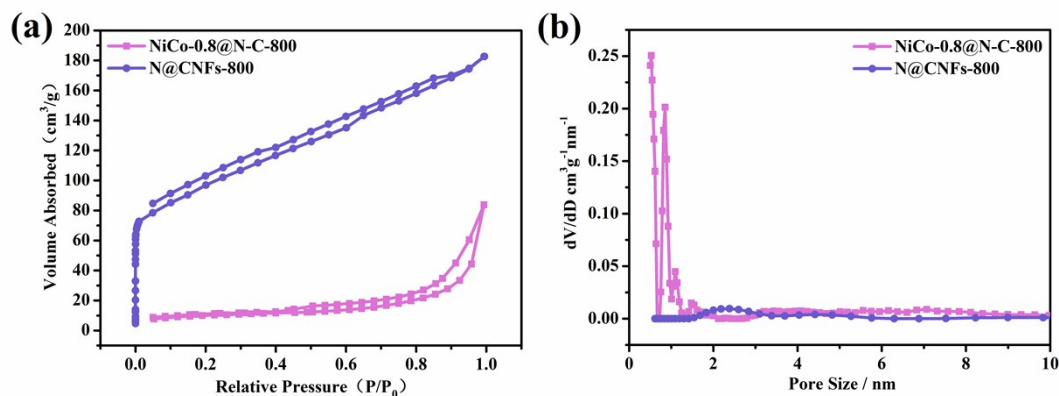

**Fig. S8** (a) N<sub>2</sub> adsorption-desorption isotherms and (b) Pore diameter distribution determined by BJH method of NiCo-0.8@N-CNFs-800 and N@CNFs-800.

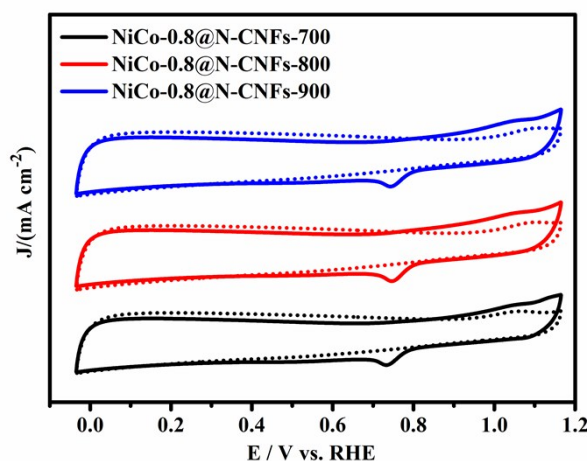

**Fig. S9** CV curves of as-prepared NiCo-0.8@N-CNFs-Ts samples for ORR in N<sub>2</sub> and O<sub>2</sub> saturated KOH solution.

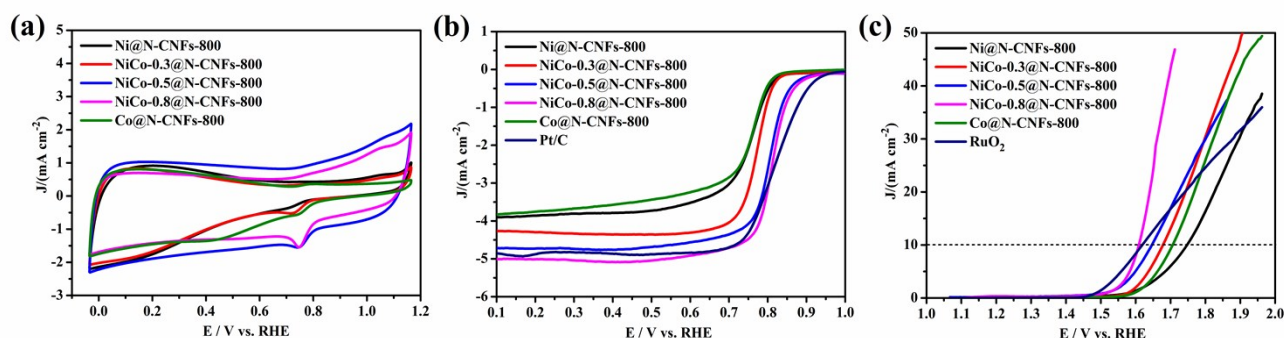

**Fig. S10** (a) CV curves at a scan rate of 50 mV s<sup>-1</sup> in O<sub>2</sub>-saturated 0.1 M KOH solution; (b, c) LSV curves for ORR and OER at a rotation speed of 1600 rpm with a scan rate of 5 mV s<sup>-1</sup> in 0.1 M O<sub>2</sub>-saturated KOH electrolyte of as-prepared NiCo-X@N-CNFs-800 samples by adding different Co/Ni mole ratio of Ni-Co-X-BTC (X = 0, 0.3, 0.5, 0.8, 1).

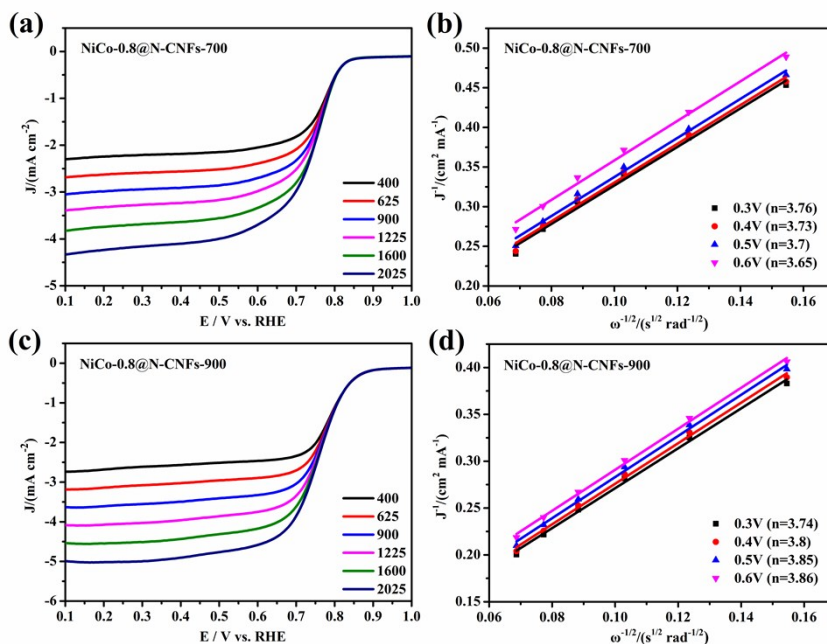

**Fig. S11** (a, b) LSV curves and corresponding K-L curves of NiCo-0.8@N-CNFs-700 and (c, d) NiCo-0.8@N-CNFs-900 at different rotation speeds (400-2025rpm) with a scan rate of  $5 \text{ mV s}^{-1}$  in  $0.1 \text{ M O}_2$ -saturated KOH.

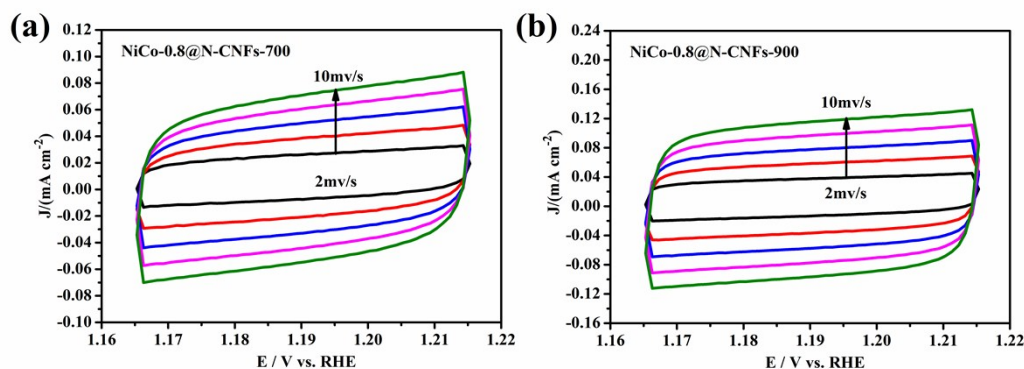

**Fig. S12** CV curves of (a) NiCo-0.8@N-CNFs-700 and (b) NiCo-0.8@N-CNFs-900 scanned at 1.165-1.215 vs. RHE at scan rates from 2 to  $10 \text{ mV s}^{-1}$ .

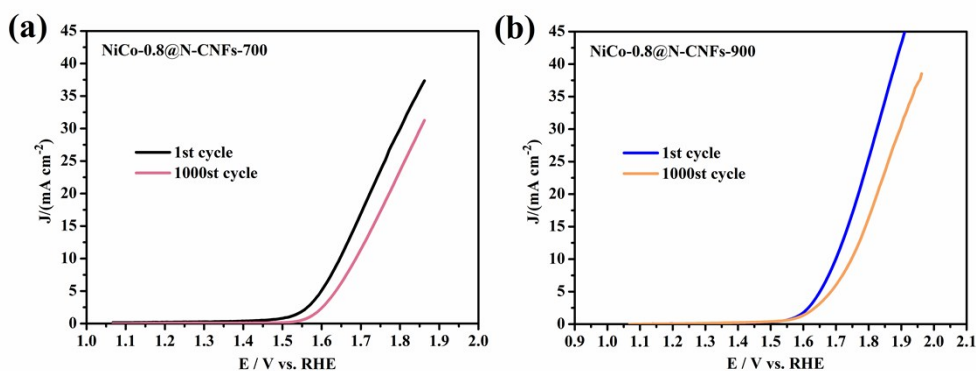

**Fig. S13** LSV curves of (a) NiCo-0.8@N-CNFs-700 and (b) NiCo-0.8@N-CNFs-900 before and after 1000 cycles at a rotation speed of 1600 rpm with a scan rate of  $5 \text{ mV s}^{-1}$ .

**Table S1.** BET surface areas,  $I_D/I_G$  and N 1s components of different samples collected from XPS results.

| Catalyst            | BET <sub>surface</sub><br>(m <sup>2</sup> g <sup>-1</sup> ) | $I_D/I_G$ | Element content<br>(wt%) |       |             | Relative content of the N species (%) |            |             |            |
|---------------------|-------------------------------------------------------------|-----------|--------------------------|-------|-------------|---------------------------------------|------------|-------------|------------|
|                     |                                                             |           | N                        | C     | Pyridinic N | NiCo-N <sub>x</sub>                   | Pyrrolic N | Graphitic N | Oxidized N |
| NiCo-0.8@N-CNFs-700 | 307.02                                                      | 1.09      | 13.18                    | 72.88 | 23.79       | 34.41                                 | 14.13      | 20.01       | 7.66       |
| NiCo-0.8@N-CNFs-800 | 419.73                                                      | 0.99      | 7.84                     | 82.39 | 17.30       | 24.02                                 | 11.96      | 33.29       | 13.44      |
| NiCo-0.8@N-CNFs-900 | 291.77                                                      | 0.96      | 3.87                     | 86.24 | 15.94       | 14.57                                 | 10.55      | 49.88       | 9.05       |
| Ni-Co-0.8@N-C-800   | 33.91                                                       | 1.26      | 2.25                     | 77.43 | 9.51        | 14.05                                 | 53.16      | 11.16       | 12.13      |
| N@CNFs-800          | 337.69                                                      | 1.13      | 6.43                     | 88.10 | 16.41       | -                                     | 32.63      | 33.23       | 17.73      |

**Table S2.** Quantitative analysis of the Ni/Co ratio in NiCo-X@N-CNFs-800 samples by ICP-AES and theoretical value.

| Samples             | Molar ratio of Ni/Co |                   |
|---------------------|----------------------|-------------------|
|                     | ICP-AES              | Theoretical value |
| NiCo-0.3@N-CNFs-800 | 0.26                 | 0.3               |
| NiCo-0.5@N-CNFs-800 | 0.41                 | 0.5               |
| NiCo-0.8@N-CNFs-800 | 0.72                 | 0.8               |

**Table S3.** ORR and OER catalytic performance of different electrocatalysts at 1600 rpm.

| Electrocatalysts    | ORR                               |                                 |                                           |                                        | OER                                            |                                        |                                           |                     |
|---------------------|-----------------------------------|---------------------------------|-------------------------------------------|----------------------------------------|------------------------------------------------|----------------------------------------|-------------------------------------------|---------------------|
|                     | E <sub>onset</sub><br>(V vs. RHE) | E <sub>1/2</sub><br>(V vs. RHE) | Current density<br>(mA cm <sup>-2</sup> ) | Tafel slope<br>(mV dec <sup>-1</sup> ) | E at j=10mA<br>cm <sup>-2</sup><br>(V vs. RHE) | Tafel slope<br>(kJ mol <sup>-1</sup> ) | C <sub>dl</sub><br>(mF cm <sup>-2</sup> ) | R <sub>ct</sub> (Ω) |
| NiCo-0.8@N-CNFs-700 | 0.825                             | 0.760                           | 3.82                                      | 78                                     | 1.645                                          | 132                                    | 5.76                                      | 45.02               |
| NiCo-0.8@N-CNFs-800 | 0.913                             | 0.820                           | 5.01                                      | 72                                     | 1.61                                           | 89                                     | 12.86                                     | 14.1                |
| NiCo-0.8@N-CNFs-900 | 0.875                             | 0.770                           | 4.54                                      | 105                                    | 1.70                                           | 118                                    | 10                                        | 30.04               |
| NiCo-0.8@N-C-800    | 0.805                             | 0.750                           | 3.64                                      | -                                      | -                                              | -                                      | -                                         | -                   |
| N@CNFs-800          | 0.705                             | 0.605                           | 2.84                                      | -                                      | -                                              | -                                      | -                                         | -                   |
| Pt/C                | 0.935                             | 0.825                           | 4.86                                      | 91                                     | -                                              | -                                      | -                                         | -                   |
| RuO <sub>2</sub>    | 0.645                             | -                               | 3.28                                      | -                                      | 1.62                                           | 65                                     | -                                         | -                   |

**TableS4.** The bifunctional performance of various catalytic materials for ORR and OER at 1600 rpm.

| Electrocatalysts    | E <sub>ORR</sub> half-wave potential |  | E <sub>OER</sub> at j=10mA cm <sup>-2</sup><br>(V vs. RHE) | E=E <sub>OER</sub> -E <sub>ORR</sub><br>(Vvs. RHE) |
|---------------------|--------------------------------------|--|------------------------------------------------------------|----------------------------------------------------|
|                     | (E <sub>1/2</sub> )<br>(V vs. RHE)   |  |                                                            |                                                    |
| NiCo-0.8@N-CNFs-700 | 0.760                                |  | 1.645                                                      | 0.885                                              |
| NiCo-0.8@N-CNFs-800 | 0.820                                |  | 1.61                                                       | 0.79                                               |
| NiCo-0.8@N-CNFs-900 | 0.770                                |  | 1.70                                                       | 0.93                                               |
| NiCo-0.8@N-C-800    | 0.750                                |  | 1.75                                                       | 1                                                  |
| N@CNFs-800          | 0.605                                |  | -                                                          | -                                                  |
| Pt/C                | 0.825                                |  | -                                                          | -                                                  |
| RuO <sub>2</sub>    | -                                    |  | 1.62                                                       | -                                                  |

**TableS5.** ORR/OER activities of previously reported bifunctional electrocatalysts in 0.1 M KOH solution at 1600rpm.

| Catalyst                                  | ORR                           |                                   | OER                                          | Oxygen electrode activity                                    | Reference                                         |
|-------------------------------------------|-------------------------------|-----------------------------------|----------------------------------------------|--------------------------------------------------------------|---------------------------------------------------|
|                                           | Onset potential<br>(V vs.RHE) | Half-wave potential<br>(V vs.RHE) | E at j=10 mA cm <sup>-2</sup><br>(V vs.RHE ) | $\Delta E = E_{OER(j=10 \text{ mA cm}^{-2})} - E_{ORR(1/2)}$ |                                                   |
| NiCo-0.8@N-CNF-700                        | 0.825                         | 0.760                             | 1.645                                        | 0.885                                                        | This work                                         |
| NiCo-0.8@N-CNF-800                        | 0.913                         | 0.820                             | 1.61                                         | 0.79                                                         | This work                                         |
| NiCo-0.8@N-CNF-900                        | 0.875                         | 0.770                             | 1.70                                         | 0.93                                                         | This work                                         |
| NiCoFe-LDH                                | 0.8                           | 0.63                              | 1.57                                         | 0.94                                                         | Adv. Energy Mater. 2015, 5, 1500245               |
| MOF(Fe/Co)-CNT                            | -                             | 0.79                              | 1.61                                         | 0.82                                                         | International journal of hydrogen 23 (2014) 16179 |
| Ni <sub>3</sub> Fe/N-C sheets             | -                             | 0.78                              | 1.6                                          | 0.82                                                         | Adv. Energy Mater. 7 (2016) 1601172.              |
| Co/N-CNTs                                 | 0.94                          | 0.84                              | 1.62                                         | 0.78                                                         | J. Mater. Chem. A 2016, 4, 1694 .                 |
| Co <sub>0.5</sub> Fe <sub>0.5</sub> S@N-M | 0.913                         | 0.808                             | 1.64                                         | 0.832                                                        | ACS Appl. Mater. Interfaces 2015, 7, 1207.        |
| Co <sub>3</sub> O <sub>4</sub> NC/N-CNT   | -                             | 0.85                              | 1.68                                         | 0.83                                                         | ChemSusChem 8 (2015) 3129.                        |
| Co <sub>3</sub> O <sub>4</sub> /NPGC      | -                             | 0.84                              | 1.68                                         | 0.84                                                         | Angew. Chem. Int. Ed. 55 (2016) 4977.             |
| Co <sub>3</sub> O <sub>4</sub>            | 0.75                          | 0.62                              | 1.64                                         | 1.02                                                         | J. Mater. Chem. A 2013, 1, 9992.                  |
| ZnCoNC-0.1                                | 0.9                           | 0.84                              | 1.75                                         | 0.91                                                         | Nano Research 2018, 11(1): 163–                   |
| CoNC                                      | -                             | 0.8                               | 1.79                                         | 0.99                                                         | 173                                               |
| FeCo-Co <sub>4</sub> N/N-C                | -                             | 0.76                              | 1.51                                         | 0.75                                                         | Adv. Mater. 2017, 29, 1704091                     |
| Co-N-GCI                                  | -                             | 0.857                             | 1.656                                        | 0.799                                                        | ACS Sustainable Chem. Eng. 2016, 4, 4131-4136     |
| Co-N-G                                    | -                             | 0.847                             | 1.702                                        | 0.855                                                        |                                                   |
| NiO/CoN PINWs                             |                               | 0.68                              | 1.53                                         | 0.85                                                         | ACS Nano 11 (2017) 2275.                          |
| NCNT/CoO-NiO-NiCo                         | 0.97                          | 0.83                              | 1.5                                          | 0.67                                                         | Angew. Chem. Int. Ed. 2015,                       |
| CoP@SNC                                   | 0.87                          | 0.79                              | 1.58                                         | 0.79                                                         | Nanoscale, 2018, 10, 14613-14626.                 |
| CNF@Zn/CoNC                               | 0.91                          | 0.82                              | 1.7                                          | 0.88                                                         |                                                   |
| CNF@ZnNC                                  | 0.87                          | 0.78                              | 1.78                                         | 1                                                            | Small 2018, 14, 1704207.                          |

$$E(\text{RHE})=E(\text{Ag}/\text{AgCl})+0.965$$
